# Supplementary material
Source: PubMed Central journal article supplement (PMC6004325)

light utilization (%)

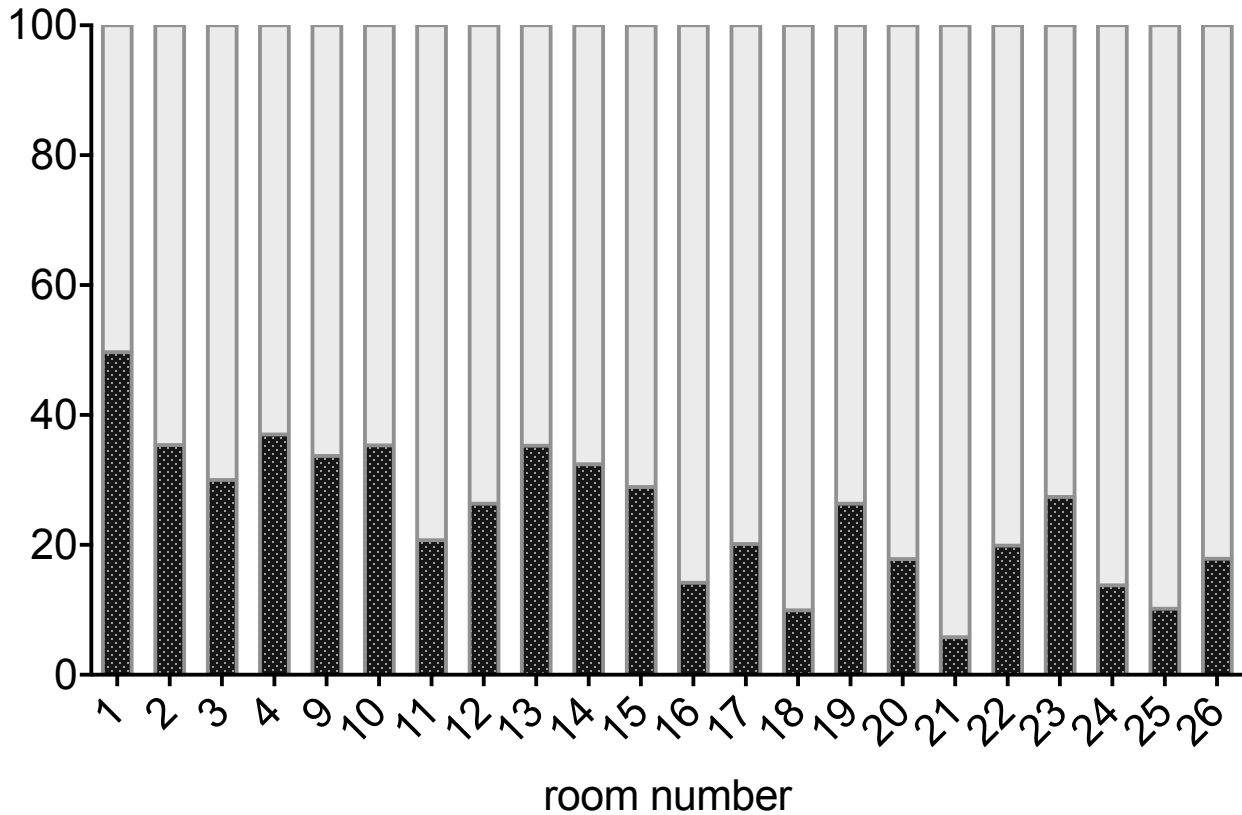

Supplement: NIHMS957279-supplement-4.pdf [file NIHMS957279-supplement-4.pdf]

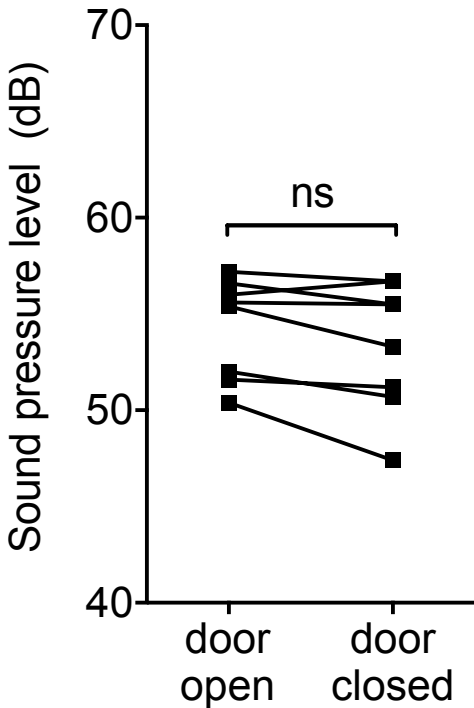

Supplement: NIHMS957279-supplement-5.pdf [file NIHMS957279-supplement-5.pdf]

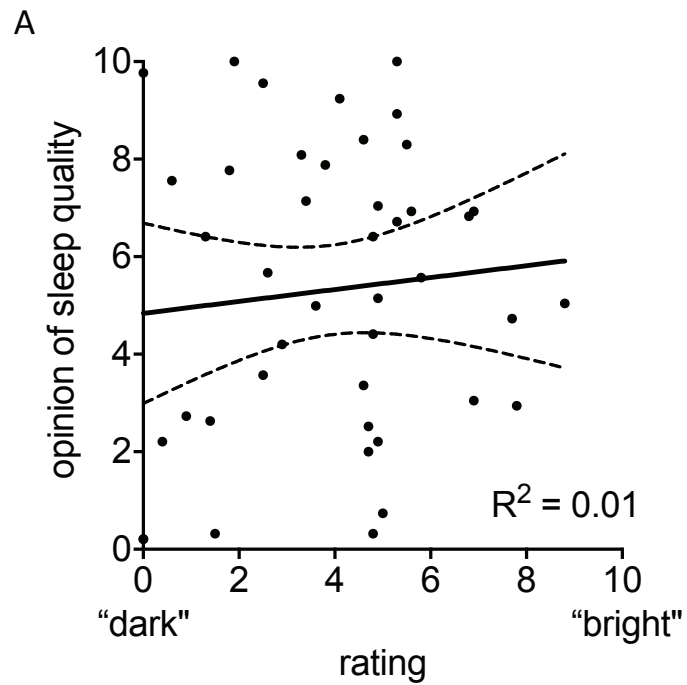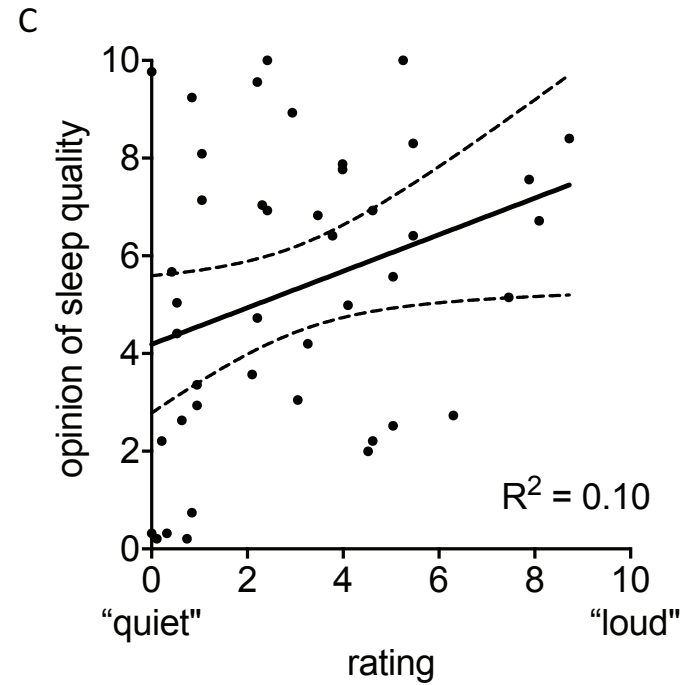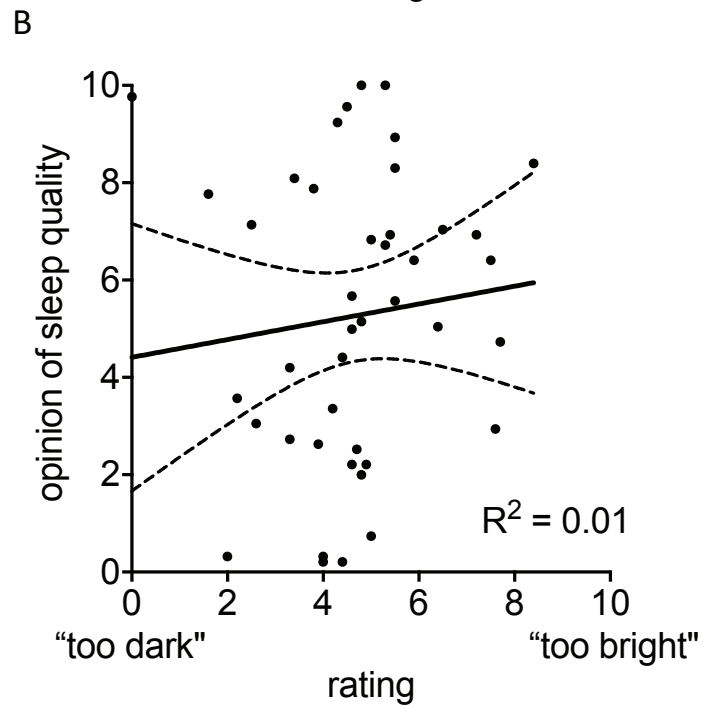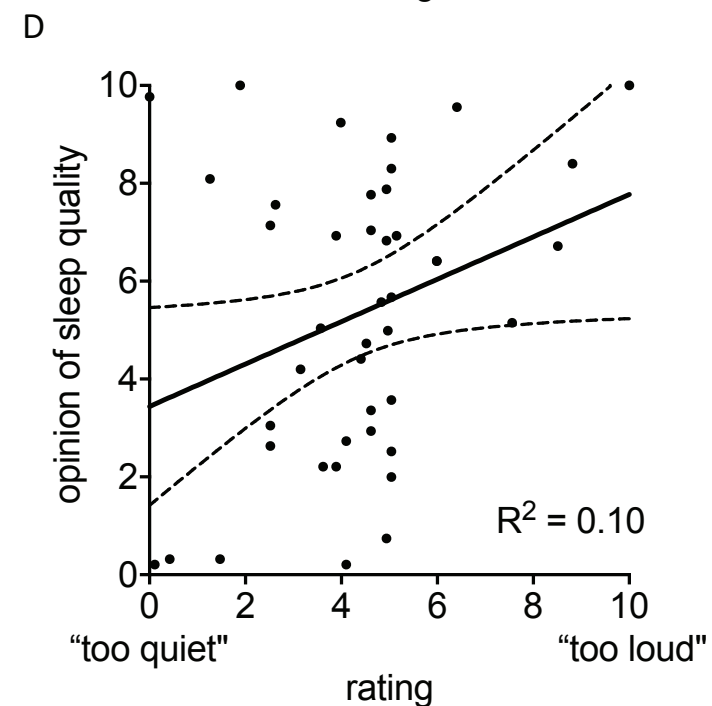

Supplement: NIHMS957279-supplement-6.pdf [file NIHMS957279-supplement-6.pdf]

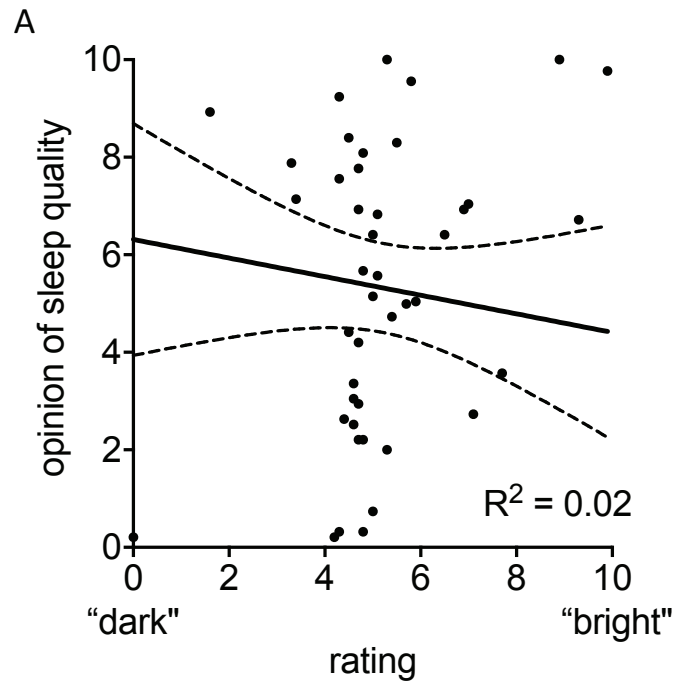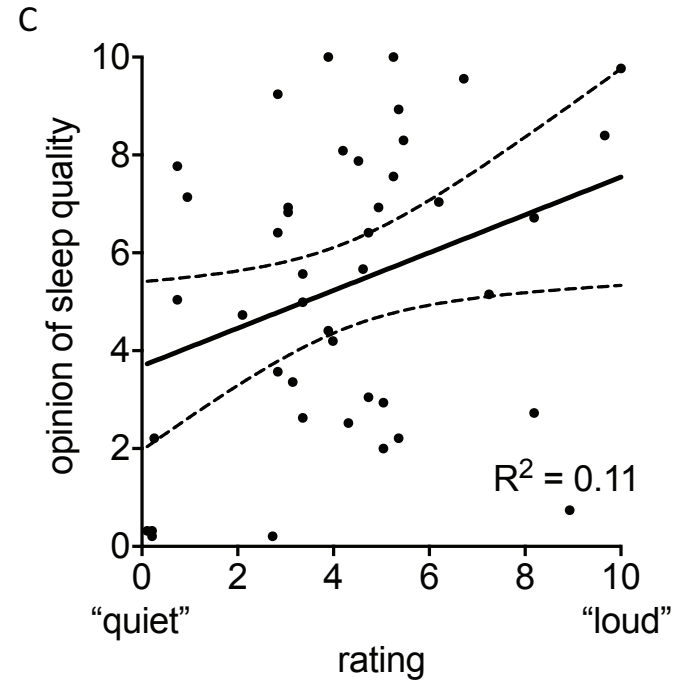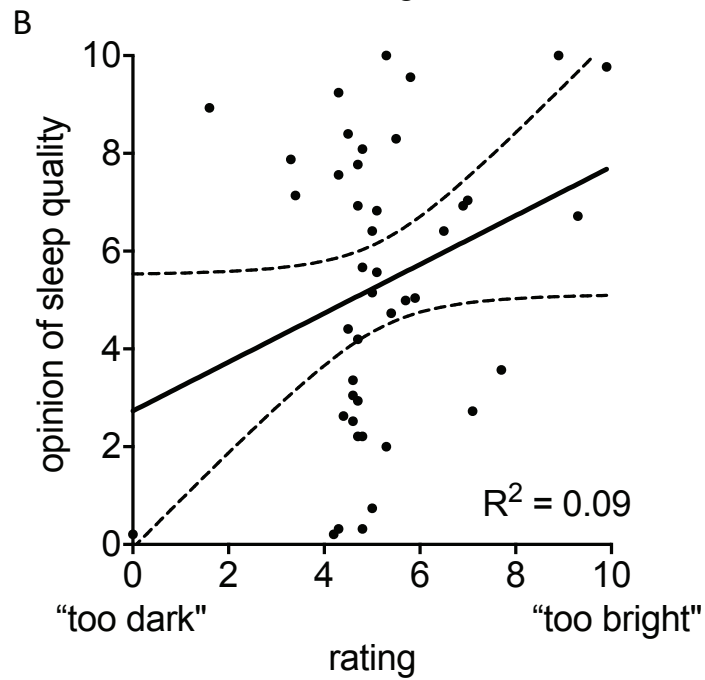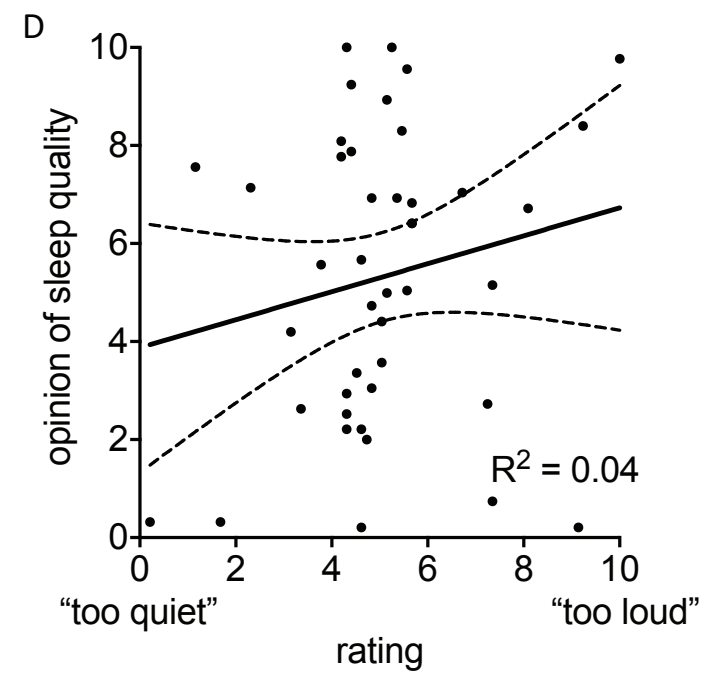

Supplement: NIHMS957279-supplement-7.pdf [file NIHMS957279-supplement-7.pdf]
